# Supplementary material
Source: Springer Nature journal article supplement (https://www.springermedizin.de/resource/supplementary/12903_2008_121_MOESM4_ESM.pdf/9517364)
Supplement: MOESM4 [file 9517364]

Type 2 diabetic subjects with oral *C. albicans* colonisation

Type 2 diabetic subjects without oral *C. albicans* colonisation

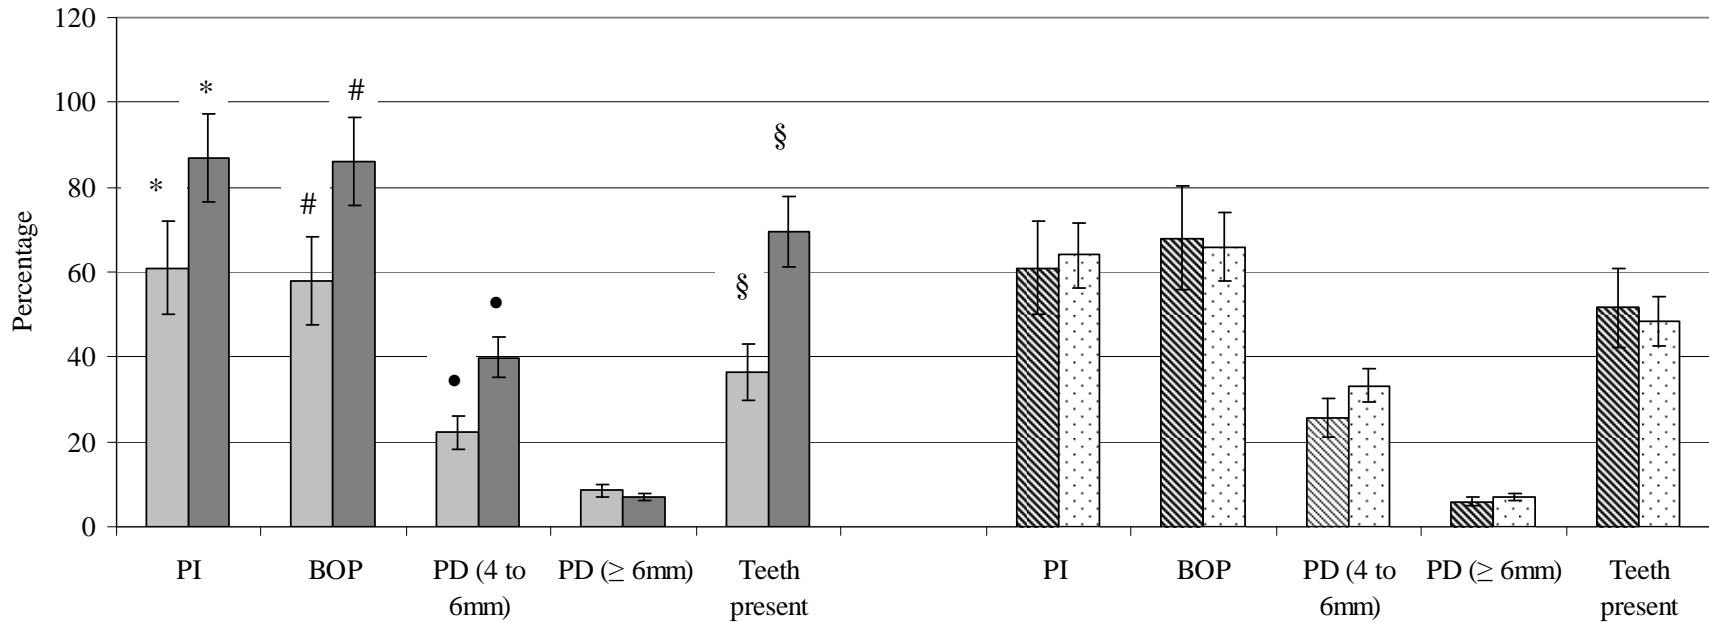

Light grey bar: Type 2 diabetic males with *Candida albicans* (*C. albicans*) colonisation

Dark grey bar: Type 2 diabetic females with *Candida albicans* (*C. albicans*) colonisation

Diagonal lines bar: Type 2 diabetic males without *Candida albicans* (*C. albicans*) colonisation

Dotted pattern bar: Type 2 diabetic females without *Candida albicans* (*C. albicans*) colonisation
